# Supplementary material for: Improved Alignment of PEDOT:PSS Induced by in-situ Crystallization of “Green” Dimethylsulfone Molecules to Enhance the Polymer Thermoelectric Performance
Source: PubMed Central journal article supplement (PMC6873659; doi:10.3389/fchem.2019.00783), 2019-11-15
Supplement: Data_Sheet_1.pdf [file Data_Sheet_1.pdf]

**Improved alignment of PEDOT:PSS induced by *in-situ* crystallization of “green” dimethylsulfone molecules to enhance the polymer thermoelectric performance**

**Qiang Zhu<sup>1</sup>, Erol Yildirim<sup>2</sup>, Xizu Wang<sup>1</sup>, Xiang Yun Debbie Soo<sup>1</sup>, Yun Zheng<sup>1</sup>, Teck Leong Tan<sup>2</sup>, Gang Wu<sup>2</sup>, Shuo-Wang Yang<sup>2\*</sup> and Jianwei Xu<sup>1,3\*</sup>**

<sup>1</sup>Institute of Materials Research and Engineering, A\*STAR (Agency for Science, Technology and Research), 2 Fusionopolis Way, Innovis, #08-03, Singapore 138634, Singapore

<sup>2</sup>Institute of High Performance Computing, A\*STAR (Agency for Science, Technology and Research), 1 Fusionopolis Way, #16-16 Connexis, Singapore 138632, Singapore

<sup>3</sup>Department of Chemistry, National University of Singapore, 3 Science Drive 3, Singapore 117543, Republic of Singapore

**\* Correspondence:**

jw-xu@imre.a-star.edu.sg (J. Xu); yangsw@ihpc.a-star.edu.sg (S-W Yang)

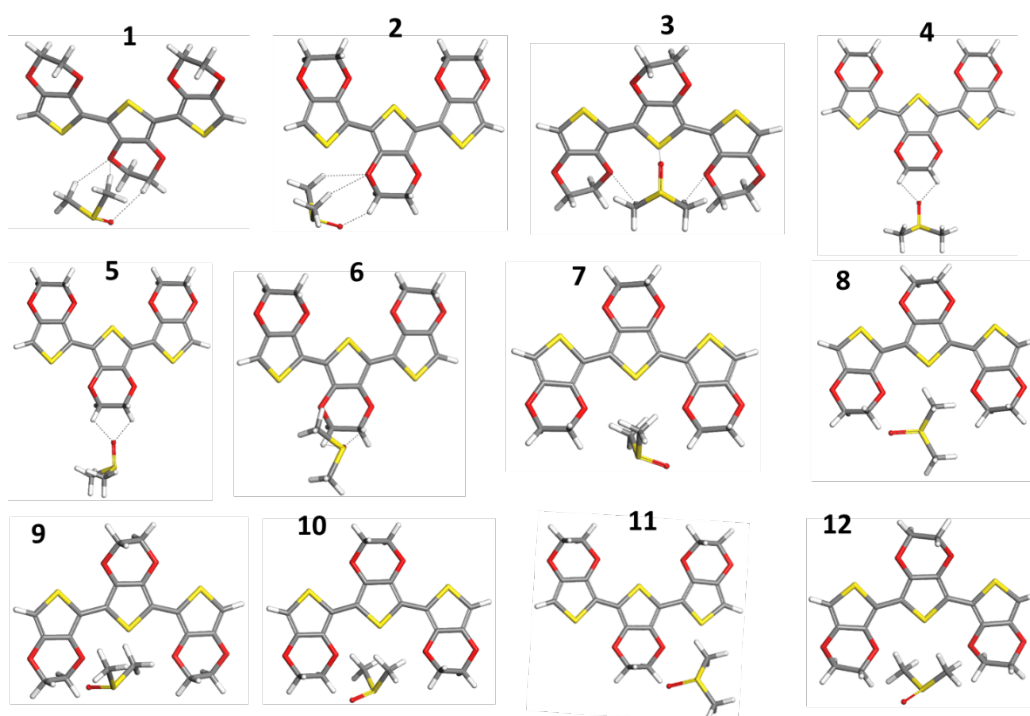

**Fig. S1** PEDOT-DMSO initial structures for DFT calculations.

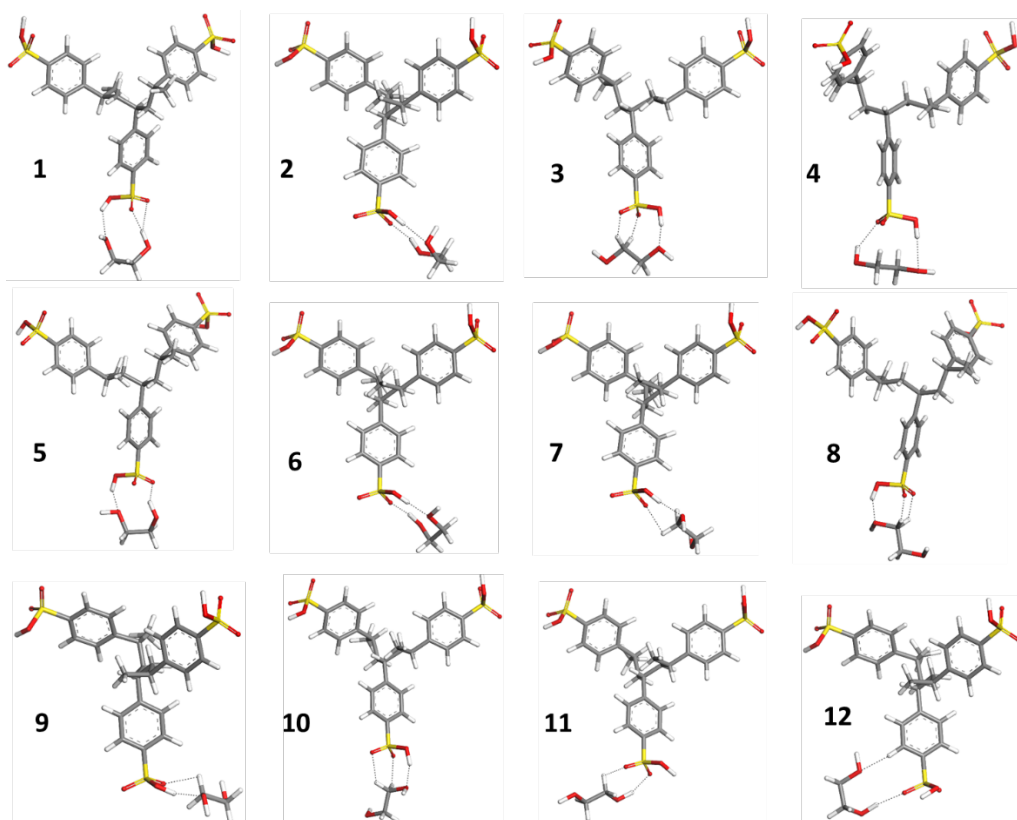

**Fig. S2** PSSH-EG initial structures for DFT calculations.

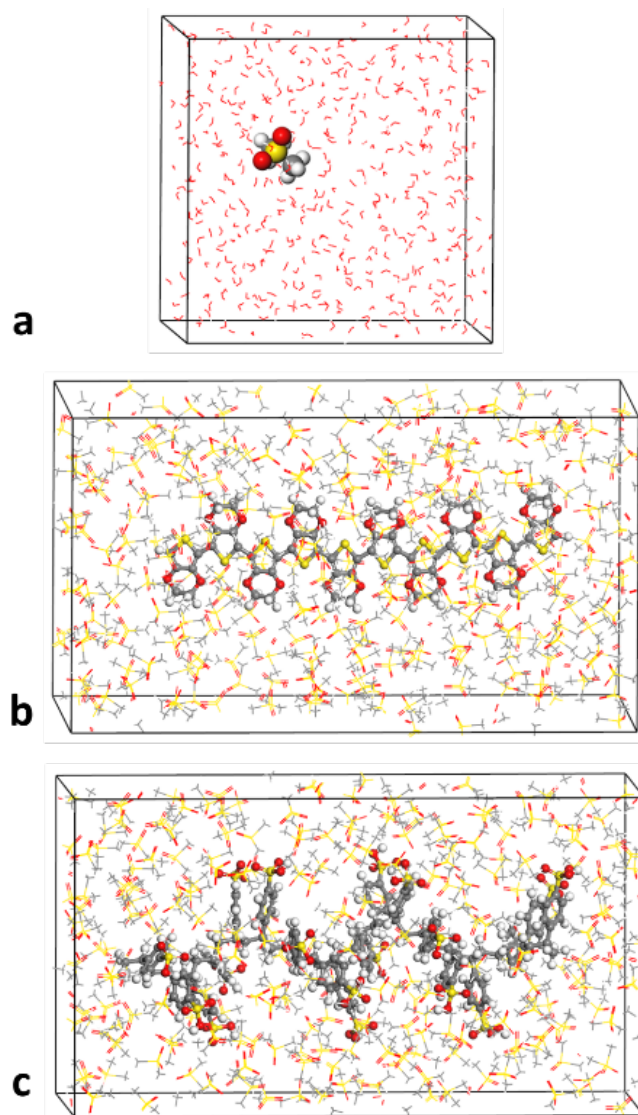

**Fig. S3** Three periodic cells constructed to calculate free energy of solvation. A) DMSO<sub>2</sub> in water, b) EDOT<sub>9</sub> in DMSO<sub>2</sub> and c) SS<sub>18</sub> in DMSO<sub>2</sub>.

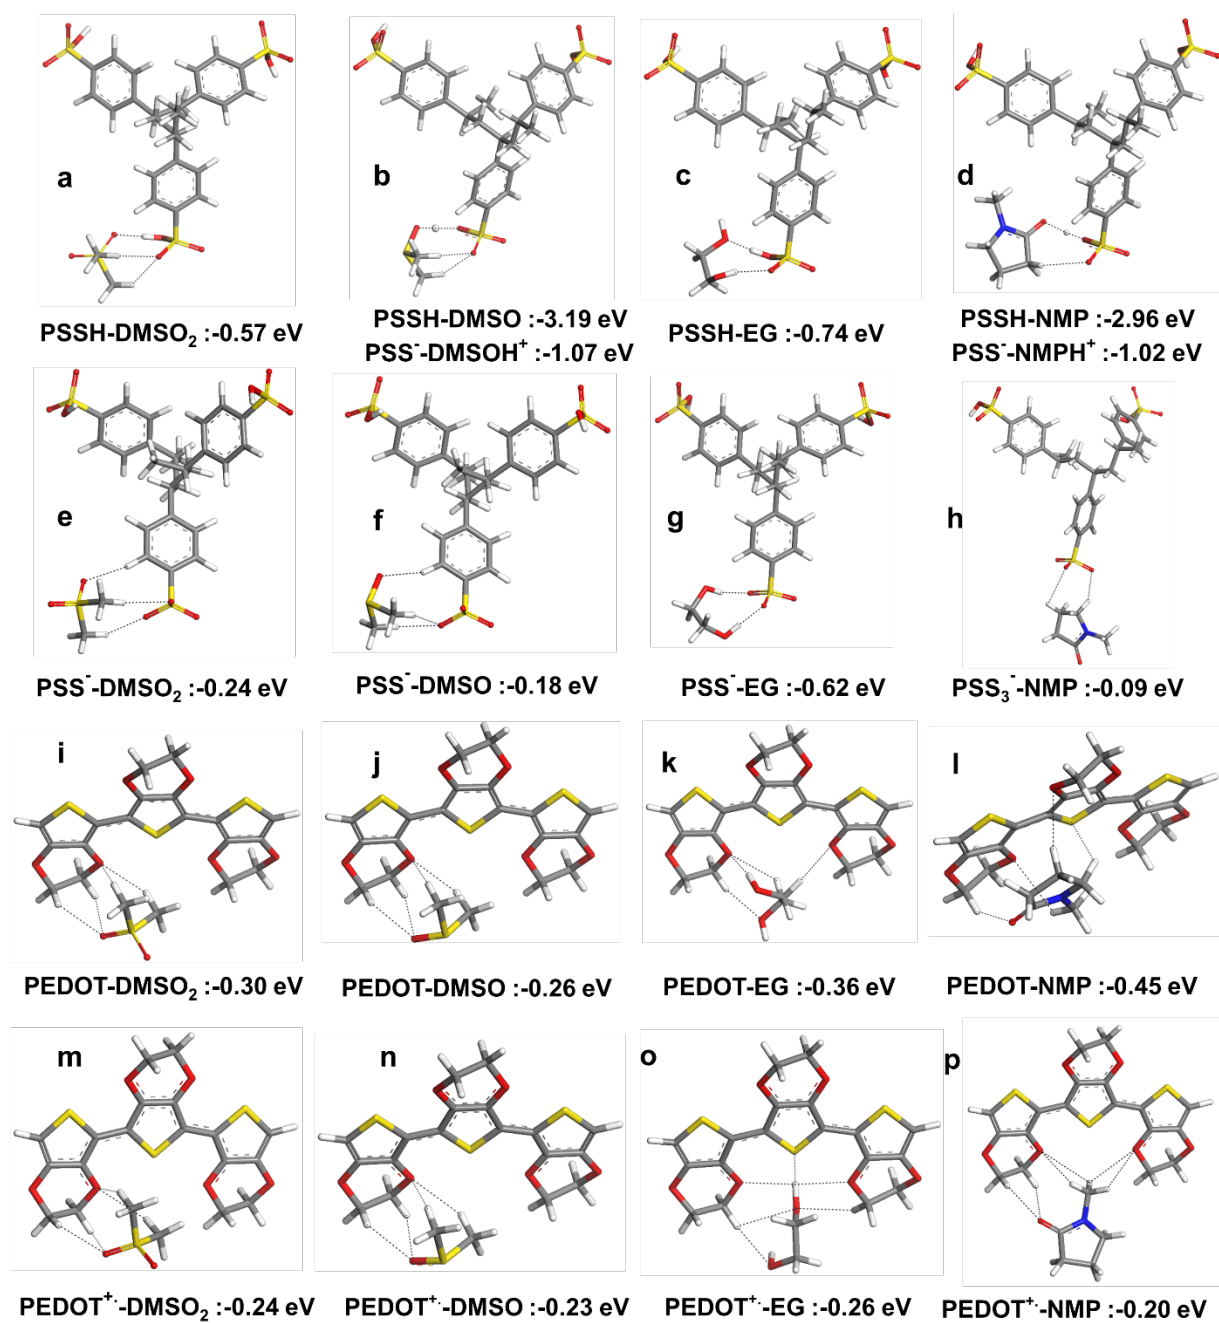

**Fig. S4** Optimized lowest energy structures and interaction energies *in water solvation* for a-d) PSSH trimer with DMSO<sub>2</sub>, DMSO, EG and NMP e-h) PSS<sup>-</sup> trimer with DMSO<sub>2</sub>, DMSO, EG and NMP, i-l) PEDOT trimer with DMSO<sub>2</sub>, DMSO, EG and NMP, m-p) PEDOT<sup>+</sup> trimer with DMSO, DMSO<sub>2</sub>, EG and NMP.

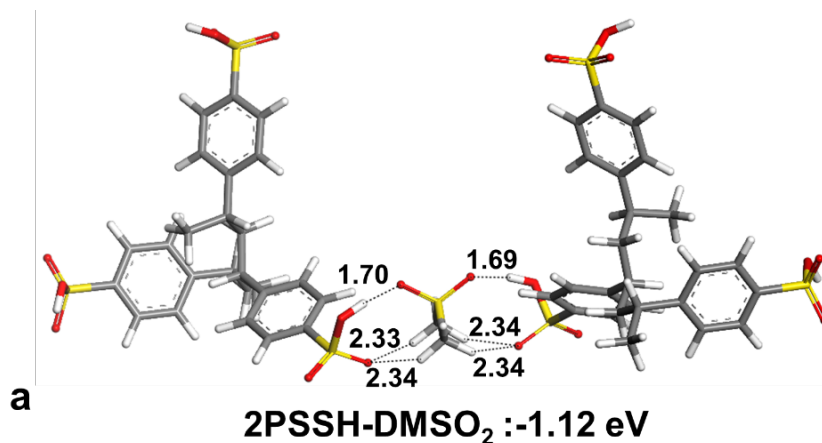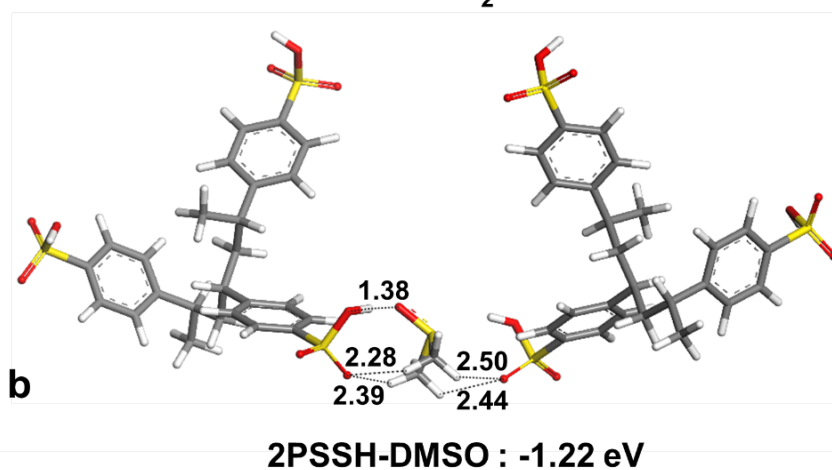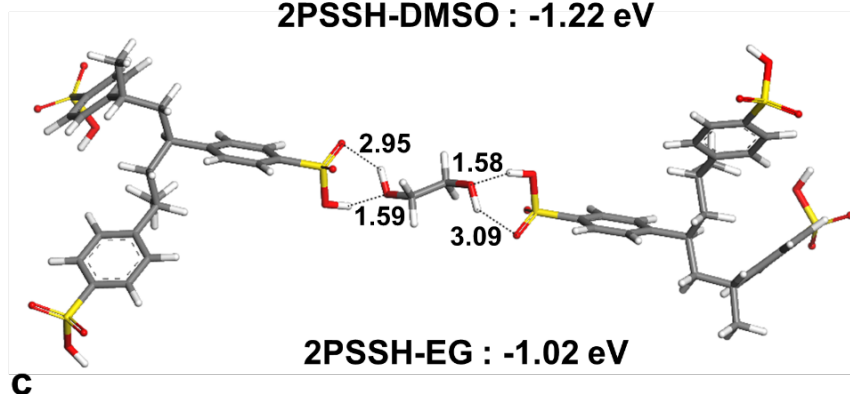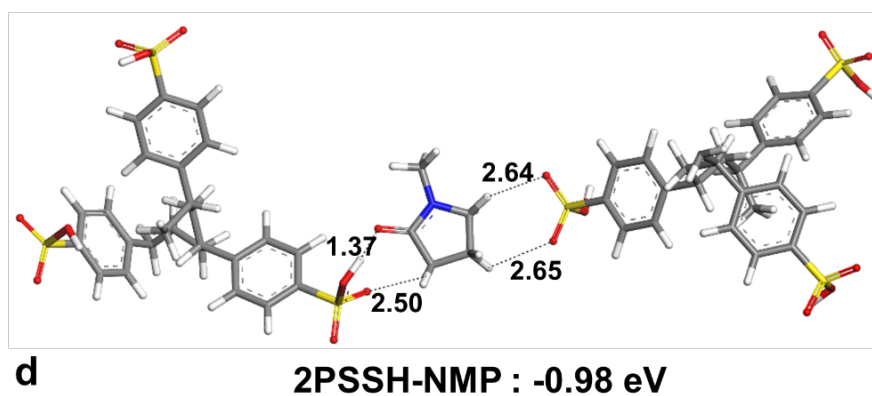

**Fig. S5** Optimized lowest energy structures and interaction energies *in water solvation effect* for a) two PSSH trimers with DMSO<sub>2</sub>, b) two PSSH trimers with DMSO, b) two PSSH trimers with EG, b) two PSSH trimers with NMP. Interaction energies calculated with water solvation effect are given in parenthesis.

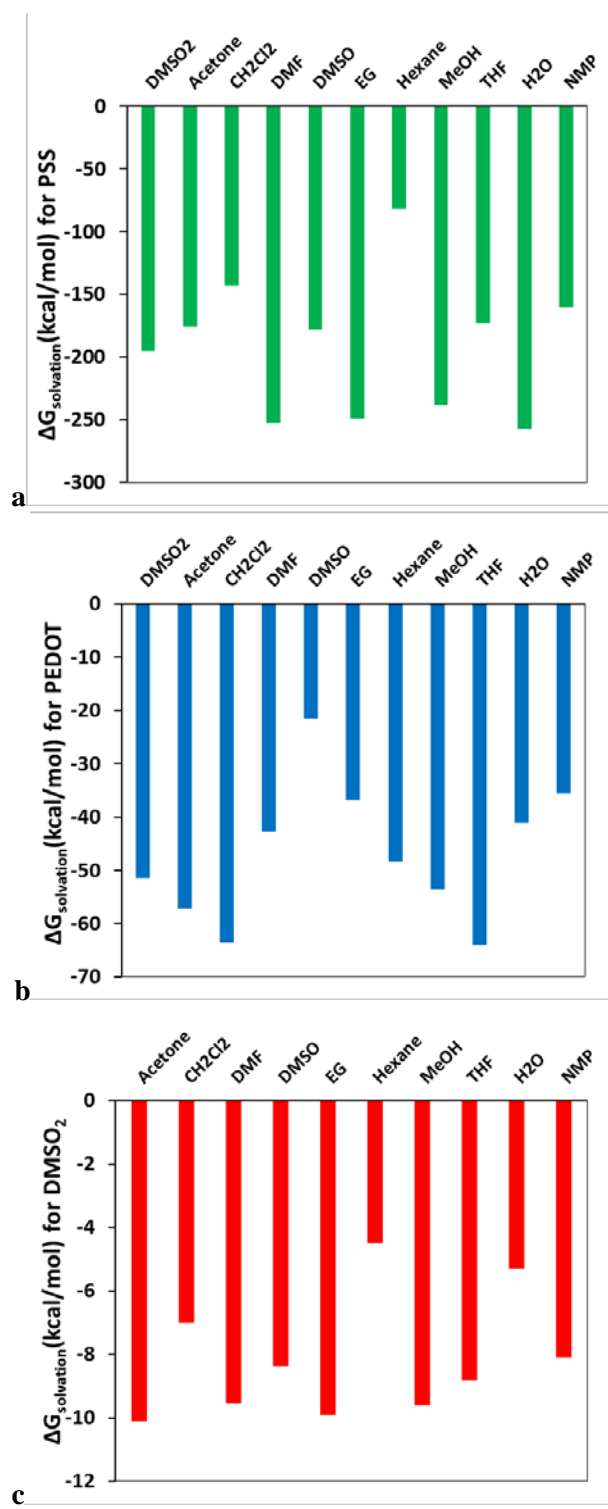

**Fig. S6** Free energy of solvation ( $\Delta G_{\text{sol}}$ ) for a)  $\text{SS}_{18}^{-3}$  b)  $\text{EDOT}_9^{+3}$  c)  $\text{DMSO}_2$  in different solvents.

**Table S1.** Comparison of this work with some reported thermoelectric properties of PEDOT films treated with different chemicals.

| Reference | Process                                                                                 | $\sigma$<br>(S/cm) | $S$<br>( $\mu\text{V}/\text{K}$ ) | $PF$<br>( $\mu\text{W}/\text{mK}^2$ ) | $\kappa$<br>(W/mK) | $ZT$ |
|-----------|-----------------------------------------------------------------------------------------|--------------------|-----------------------------------|---------------------------------------|--------------------|------|
| This work | PEDOT:PSS treated with DMSO <sub>2</sub>                                                | 1080               | 17.1                              | 32                                    | 0.54               | 0.02 |
| 1         | PEDOT:PSS treated with DMSO, then DMSO and hydrazine                                    | 677                | 41                                | 115                                   | 0.17               | 0.2  |
| 2         | PEDOT:PSS treated with a mixture of DMSO and hydrazine                                  | 578                | 67                                | 112                                   | -                  |      |
| 3         | PEDOT:PSS treated with p-toluenesulfonic acid monohydrate, then hydrazine/DMSO solution | ~1300              | ~50                               | 318                                   | 0.30               | 0.31 |
| 4         | Addition of DMSO in to PEDOT:PSS and then treated with poly(ethylene oxide)             | 1061               | 38.4                              | 157                                   | -                  | -    |
| 5         | PEDOT:PSS treated with DMSO/NaBH <sub>4</sub>                                           | ~580               | ~40                               | 98                                    | 0.45               | 0.06 |

#### References

1. S. H. Lee, H. Park, W. Son, H. H. Choi and J. H. Kim, *J. Mater. Chem. A*, 2014, **2**, 13380-13387.
2. H. Park, S. H. Lee, F. S. Kim, H. H. Choi, I. W. Cheong, and J. H. Kim, *J. Mater. Chem. A*, 2014, **2**, 6532-6539.
3. S. H. Lee, H. Park, S. Kim, W. Son, I. W. Cheong and J. H. Kim, *J. Mater. Chem. A*, 2014, **2**, 7288-7294.
4. C. Yi, A. Wilhite, L. Zhang, R. Hu, S. S. C. Chuang, J. Zheng, and X. Gong, *ACS Appl. Mater. Interfaces*, 2015, **7**, 8984-8989.
5. J. Wang, K. Cai and S. Shen, *Org. Electron.*, 2015, **17**, 151-158.
